# Supplementary material
Source: PubMed Central journal article supplement (PMC8906405)
Supplement: jvi.02057-21-s0001.pdf [file jvi.02057-21-s0001.pdf]

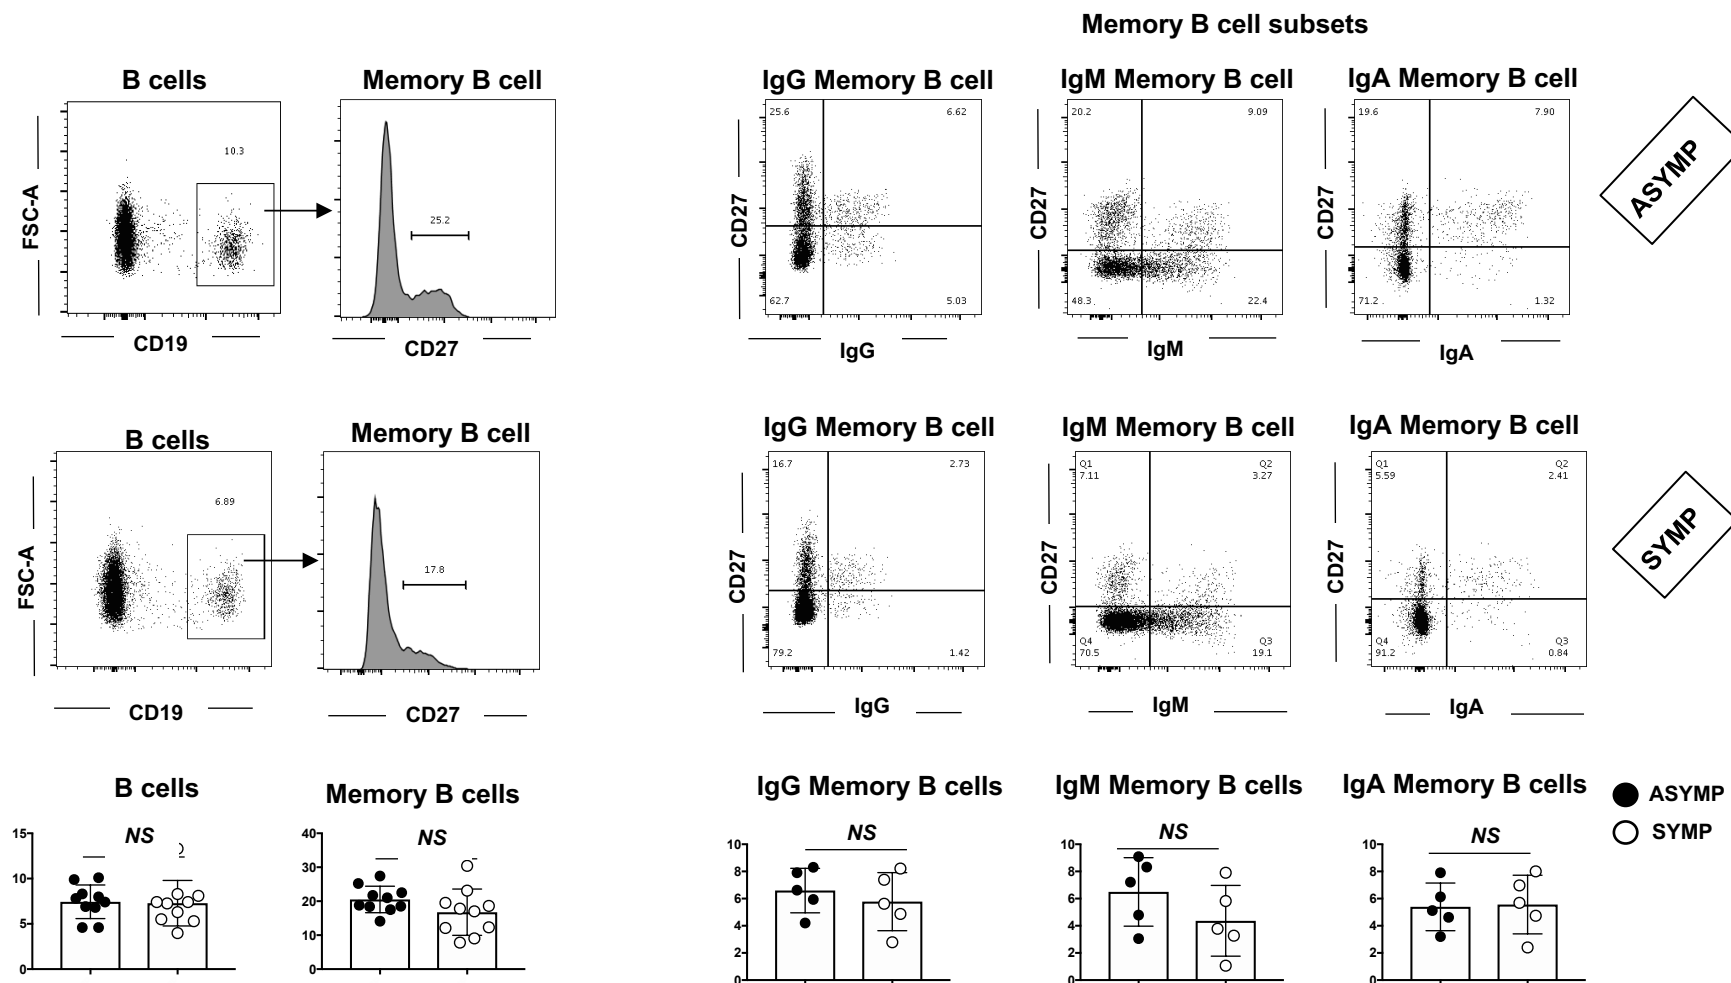

**Supplementary Figure 1. B cell profile of ASYMP and SYMP HSV-1 infected individuals:** PBMC of ASYMP and SYMP infected individuals were stained for percentage of IgG (CD19+ CD27+IgG+), IgM (CD19+ CD27+IgM+), and (IgA CD19+ CD27+IgA+) memory B cells. Graphs showing percentage of B cells, memory B cells, IgG, IgA and IgM memory B cells in ASYMP and SYMP HSV-1 infected individuals.
